# Supplementary material for: Utilization of Iron Ore Tailings as Raw Material for Portland Cement Clinker Production
Source: Hindawi journal article supplement (doi:10.1155/2016/1596047), 2016-01-01
Supplement: f1 [file 1596047.f1.pdf]

**Table 1 Chemical composition of the IOT (wt %)**

| Component                      | %     | Component                     | %    |
|--------------------------------|-------|-------------------------------|------|
| SiO <sub>2</sub>               | 45.41 | MnO                           | 0.18 |
| Al <sub>2</sub> O <sub>3</sub> | 19.07 | CuO                           | 0.02 |
| Fe <sub>2</sub> O <sub>3</sub> | 10.86 | SrO                           | 0.05 |
| CaO                            | 12.41 | ZrO <sub>2</sub>              | 0.01 |
| MgO                            | 7.23  | P <sub>2</sub> O <sub>5</sub> | 0.08 |
| K <sub>2</sub> O               | 0.44  | SO <sub>3</sub>               | 0.44 |
| Na <sub>2</sub> O              | 1.38  | Cl                            | 0.04 |
| TiO <sub>2</sub>               | 1.32  | LOI                           | 1.22 |
